# Supplementary material for: Differences in Processing Quality Traits, Protein Content and Composition between Spelt and Bread Wheat Genotypes Grown under Conventional and Organic Production
Source: MDPI journal article supplement (doi:10.3390/foods10010156), 2021-01-13
Supplement: s1 [file s1]

# **Differences in processing quality traits, protein content and composition between spelt and bread wheat genotypes grown under conventional and organic production**

**Verica Takač<sup>1\*</sup>, Viola Tóth<sup>2</sup>, Marianna Rakszegi<sup>2</sup>, Sanja Mikić<sup>1</sup>, Milan Mirosavljević<sup>1</sup> and Ankica Kondić-Špika<sup>1</sup>**

<sup>1</sup> Institute of Field and Vegetable Crops, Maksima Gorkog 30, 21000 Novi Sad, Serbia; verica.takac@ifvcns.ns.ac.rs (V.T.); sanja.mikic@ifvcns.ns.ac.rs (S.M.); milan.mirosavljevic@ifvcns.ns.ac.rs (M.M.); ankica.spika@ifvcns.ns.ac.rs (A.K.S.)

<sup>2</sup> Agricultural Institute, Centre for Agricultural Research, Brunszvik u. 2, 2462-Martonvásár, Hungary; rakszegi.mariann@atk.hu (M.R.); toth.viola@atk.hu (T.V.)

\* Correspondence: verica.takac@ifvcns.ns.ac.rs; Tel.: +381-21-4898-214

Received: date; Accepted: date; Published: date

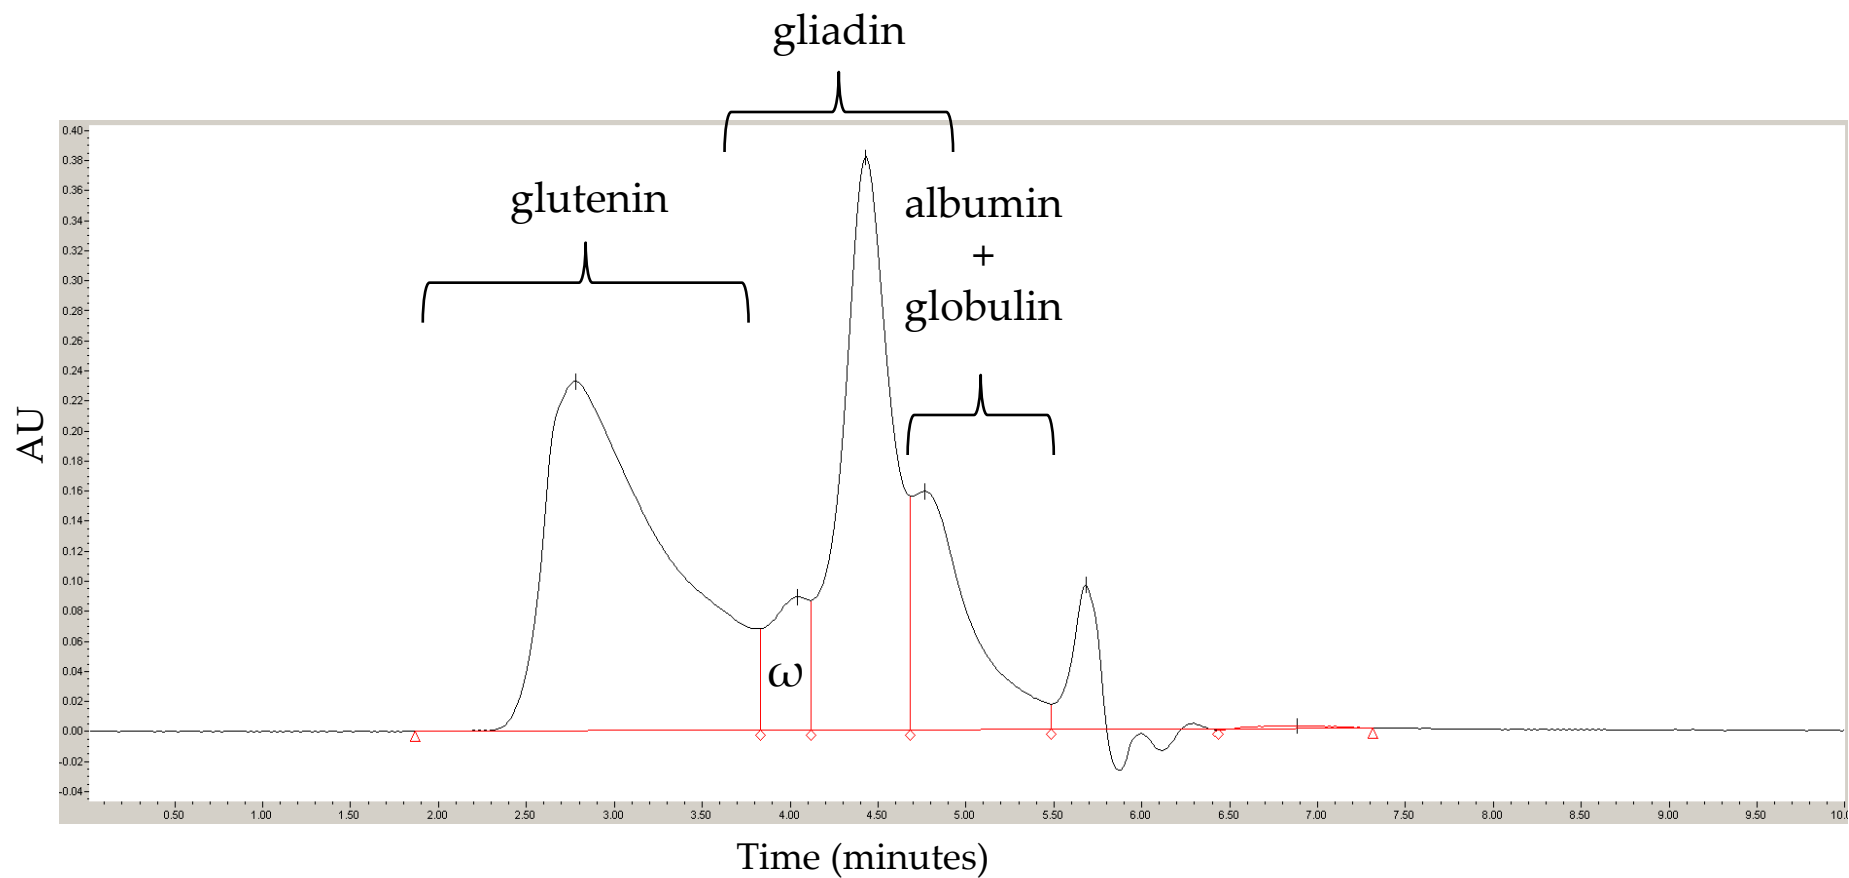

**Figure S1.** The chromatogram for SE-HPLC analysis representing individual peaks for total wheat proteins, encompassing soluble and insoluble proteins

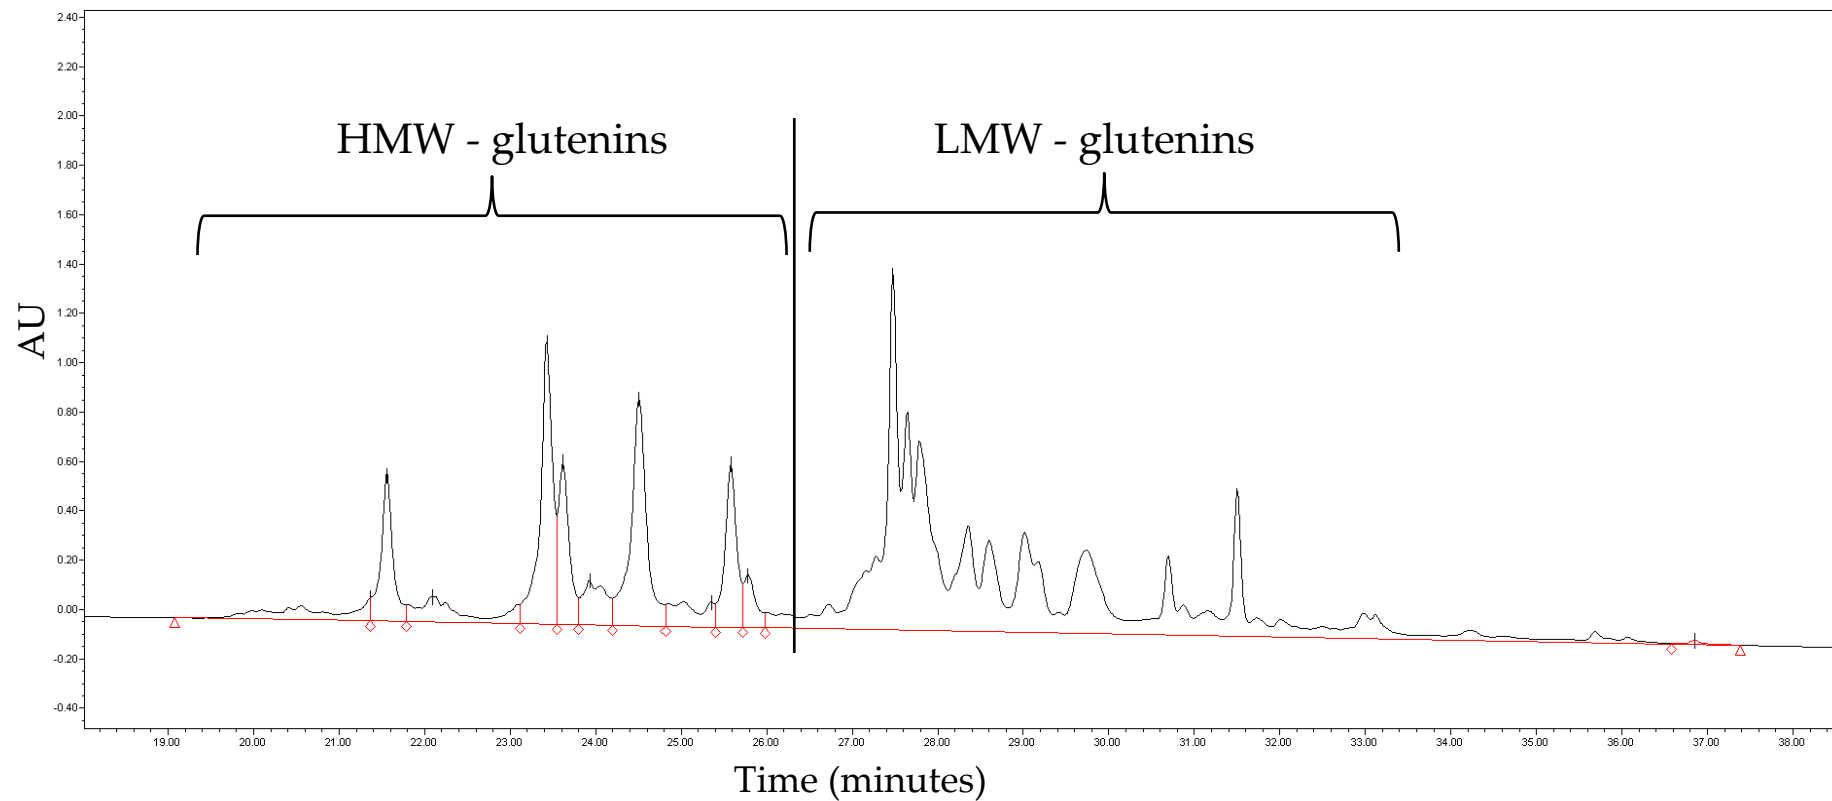

**Figure S2.** The chromatogram for RP-HPLC analysis representing the individual peaks for HMW and LMW glutenin subunits

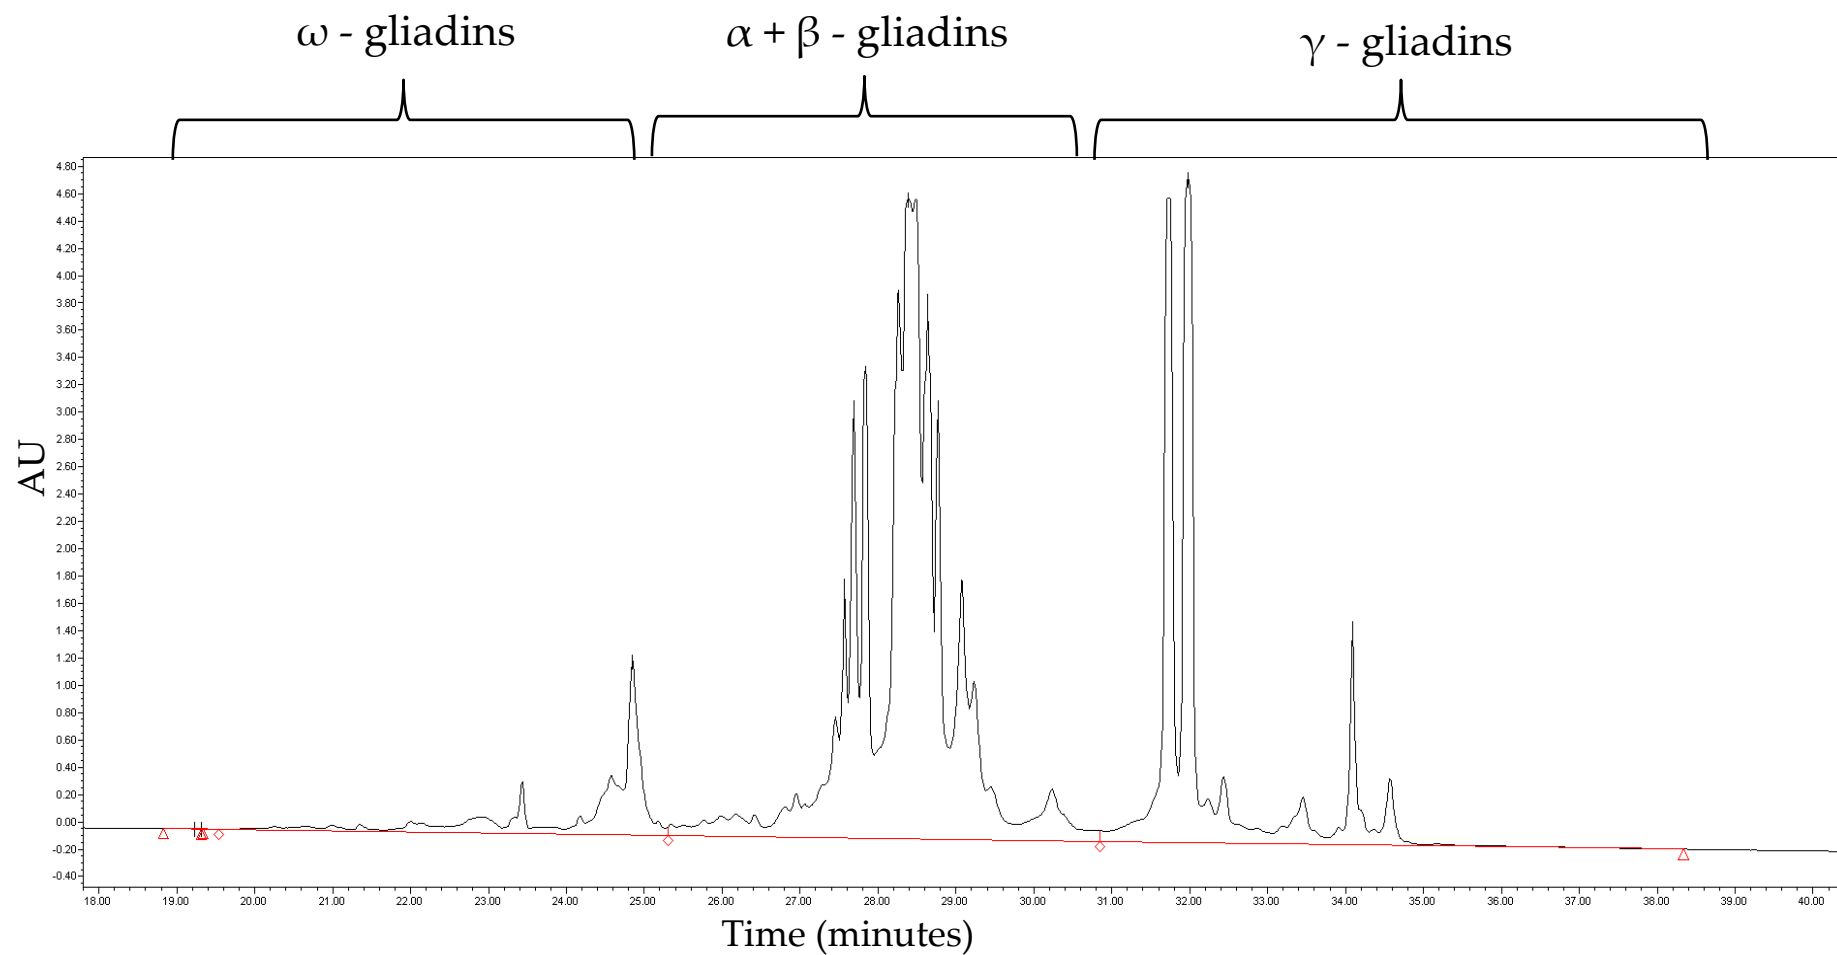

**Figure S3.** The chromatogram for RP-HPLC analysis representing the individual peaks for  $\omega$ ,  $\alpha + \beta$  and  $\gamma$  gliadins
